# Supplementary material
Source: publisher site journal article supplement (https://www.spandidos-publications.com/4287/downloadSupplementary)
Supplement: Supplementary file 1 [file downloadSupplementary]

## Sheet: Sheet1
Table SI. RT-qPCR primers for gene expression quantification.
Gene	Primer	Sequence (5'-3')	Related figures
GAPDH	Forward	TTGCCATCAATGACCCCTTCA	Fig. 2A
	Reverse	CGCCCCACTTGATTTTGGA
DEK	Forward	CAAAGCCTTCTGGCAAACCA	Fig. 2A
	Reverse	CCTTGCCATTCCAGAACTGTTC
